# Supplementary material for: Genome-Wide Identification and Expression Analysis of MAPK Gene Family in Lettuce (Lactuca sativa L.) and Functional Analysis of LsMAPK4 in High- Temperature-Induced Bolting
Source: MDPI journal article supplement (doi:10.3390/ijms231911129), 2022-09-22
Supplement: s1 [file s1]

**Table S1.** Primers for qRT–PCR

**Figure S1.** Sequence alignment between LsMAPK4 and LsMAPK4 \*. (A) Gene sequence alignment. (B) Open Reading Frame sequence alignment.

**Figure S2.** Multiple sequence alignment of LsMAPKs
