# Supplementary material for: Genome-Wide Identification and Expression Analysis of MAPK Gene Family in Lettuce (Lactuca sativa L.) and Functional Analysis of LsMAPK4 in High- Temperature-Induced Bolting
Source: Int J Mol Sci. 2022 Sep 22;23(19):11129. doi: 10.3390/ijms231911129 (PMC9569992; doi:10.3390/ijms231911129)
Supplement: Supplementary file 1 [file ijms-23-11129-s001.zip]

Archive with 4 entries (4 files):
- Figure S1.tif
- Figure S2.tif
- Supplement Table and Figure Legends.pdf
- Table S1.xlsx
