# Supplementary material for: Genome-Wide Identification and Expression Analysis of MAPK Gene Family in Lettuce (Lactuca sativa L.) and Functional Analysis of LsMAPK4 in High- Temperature-Induced Bolting
Source: Int J Mol Sci. 2022 Sep 22;23(19):11129. doi: 10.3390/ijms231911129 (PMC9569992; doi:10.3390/ijms231911129)
Supplement: Supplementary file 1 [file ijms-23-11129-s001.zip › Table S1.xlsx]

## Sheet: Sheet1
	Primer name	Primer sequence (5'-3')
	LsMAPK1-F	CTGGGACTTCGTTTTCAAGGCTTTATC
	LsMAPK1-R	CGCATCCACCACACTAATCCTCTTC
	LsMAPK1-2-F	CAAGGGACTTCGTTTAATCGGTTGTATC
	LsMAPK1-2-R	GCTTCGGTCACACTAATCCTCTTCG
	LsMAPK1-3-F	GGGATGAGGTGATTAGGGAGATGATTTG
	LsMAPK1-3-R	ACGGATTACCAATGGAAACAGAAACAAC
	LsMAPK3-F	TCACGGAGGCCAGTTCATCC
	LsMAPK3-R	AGCACCACGACCAATAGGCA
	LsMAPK3-2-F	GCCAGTTCGTTCGCTACAACATATTC
	LsMAPK3-2-R	TCTTCATACCAACCATCTCATTCGTCTC
	LsMAPK4-F	TTCTTACACATGGCGGTCGTTACG
	LsMAPK4-R	CAACAGGTCTGATCGGAGGAACATAC
	LsMAPK4-2-F	GCCAAGAGGACTTTAAGGGAAATCAAAC
	LsMAPK4-2-R	TTTATTTGGTGGGCGTATGATGTCTTTG
	LsMAPK4-3-F	CAGGGGTGGTGTTGAAAGGAGTTC
	LsMAPK4-3-R	GCTGAATCGGAGGAACGTACTTAGAAG
	LsMAPK6-F	CGCTTACGGCATAGTCTGTTCGG
	LsMAPK6-R	CGCAGTGTCCTCTTCGCATCG
	LsMAPK7-F	AGCCAAGGAAGCGAACAGTTCATG
	LsMAPK7-R	CACATCAATGGAGGTCCCGTAGTTG
	LsMAPK9-F	CGATCCTCTTCTGTTCCTAATCCTGATG
	LsMAPK9-R	AGTCTTCGGTAATGGTGAGTTGATTCG
	LsMAPK9-2-F	AAACGCATCGCATTCCCATCTTTAAC
	LsMAPK9-2-R	GCCTCTCCATATTCGGTGAAGAACTC
	LsMAPK16-F	ATAGGTCCAACGAATCAGACATCAACTC
	LsMAPK16-R	CACAGCACTTCAAACAGCACAACC
	LsMAPK16-2-F	AGTTGCGTCACTGTCACCTTGTATC
	LsMAPK16-2-R	TGAGTCGTTGAAGCCAAGAAAGAGG
	LsMAPK16-3-F	AGTTGCGTCACTGTCACCTTGTATC
	LsMAPK16-3-R	TGAGTCGTTGAAGCCAAGAAAGAGG
	LsMAPK16-4-F	TGCTATCAGTGTCACTCGTGAGATTAAG
	LsMAPK16-4-R	AAATTCTTTTCTGGATGGAGGCAACAAG
	Ls18S-F	GTGAGTGAAGAAGGGCAATG
	Ls18S-R	CACTTTCAACCCGATTCACC
